# Supplementary material for: Disentangling white-matter damage from physiological fibre orientation dispersion in multiple sclerosis
Source: PubMed Central journal article supplement (PMC7472898; doi:10.1093/braincomms/fcaa077), 2020-06-08
Supplement: fcaa077_supplementary_data.pdf [file fcaa077_supplementary_data.pdf]

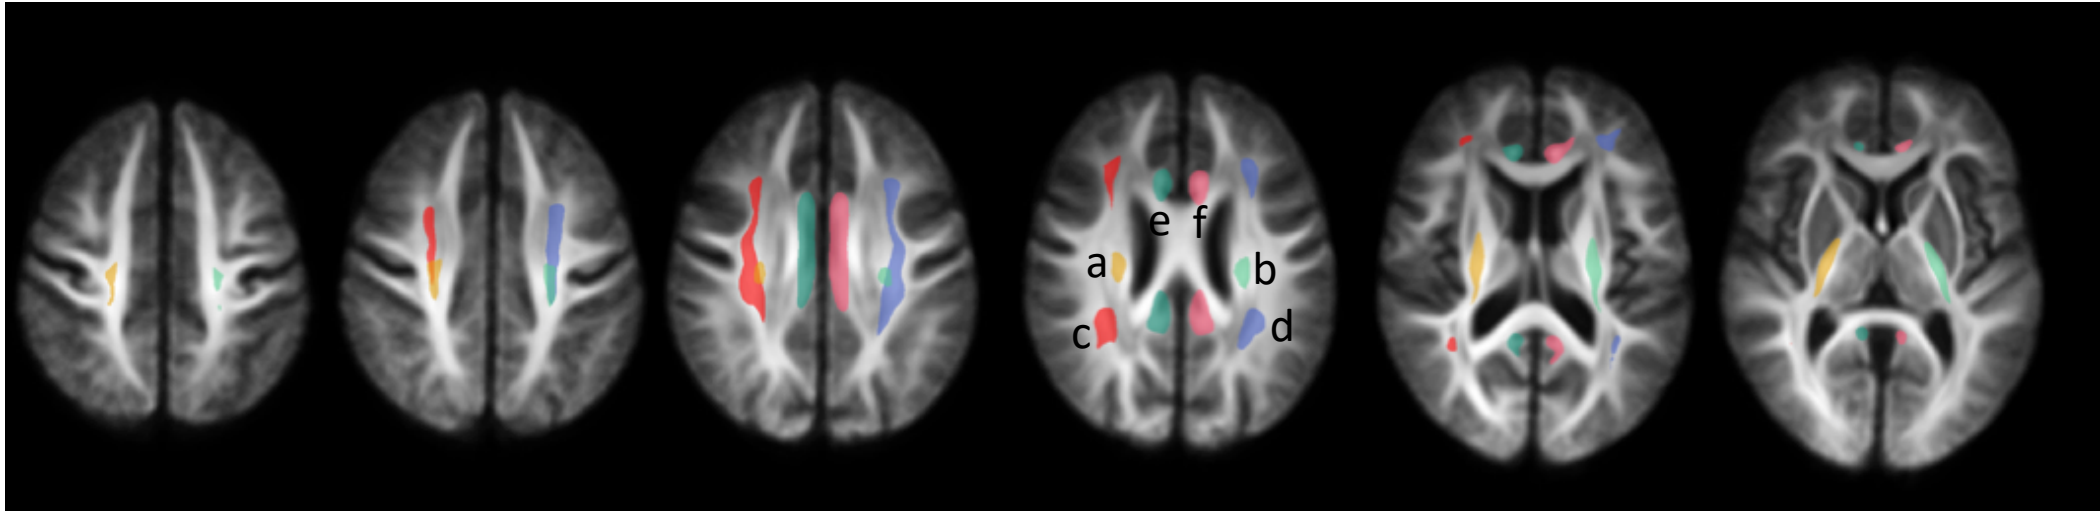

**Supplementary Figure 1** | ROIs used in the study. Left (a) and right (b) corticospinal tract. Left (c) and right (d) superior longitudinal fasciculus. Left (e) and right (f) cingulum.

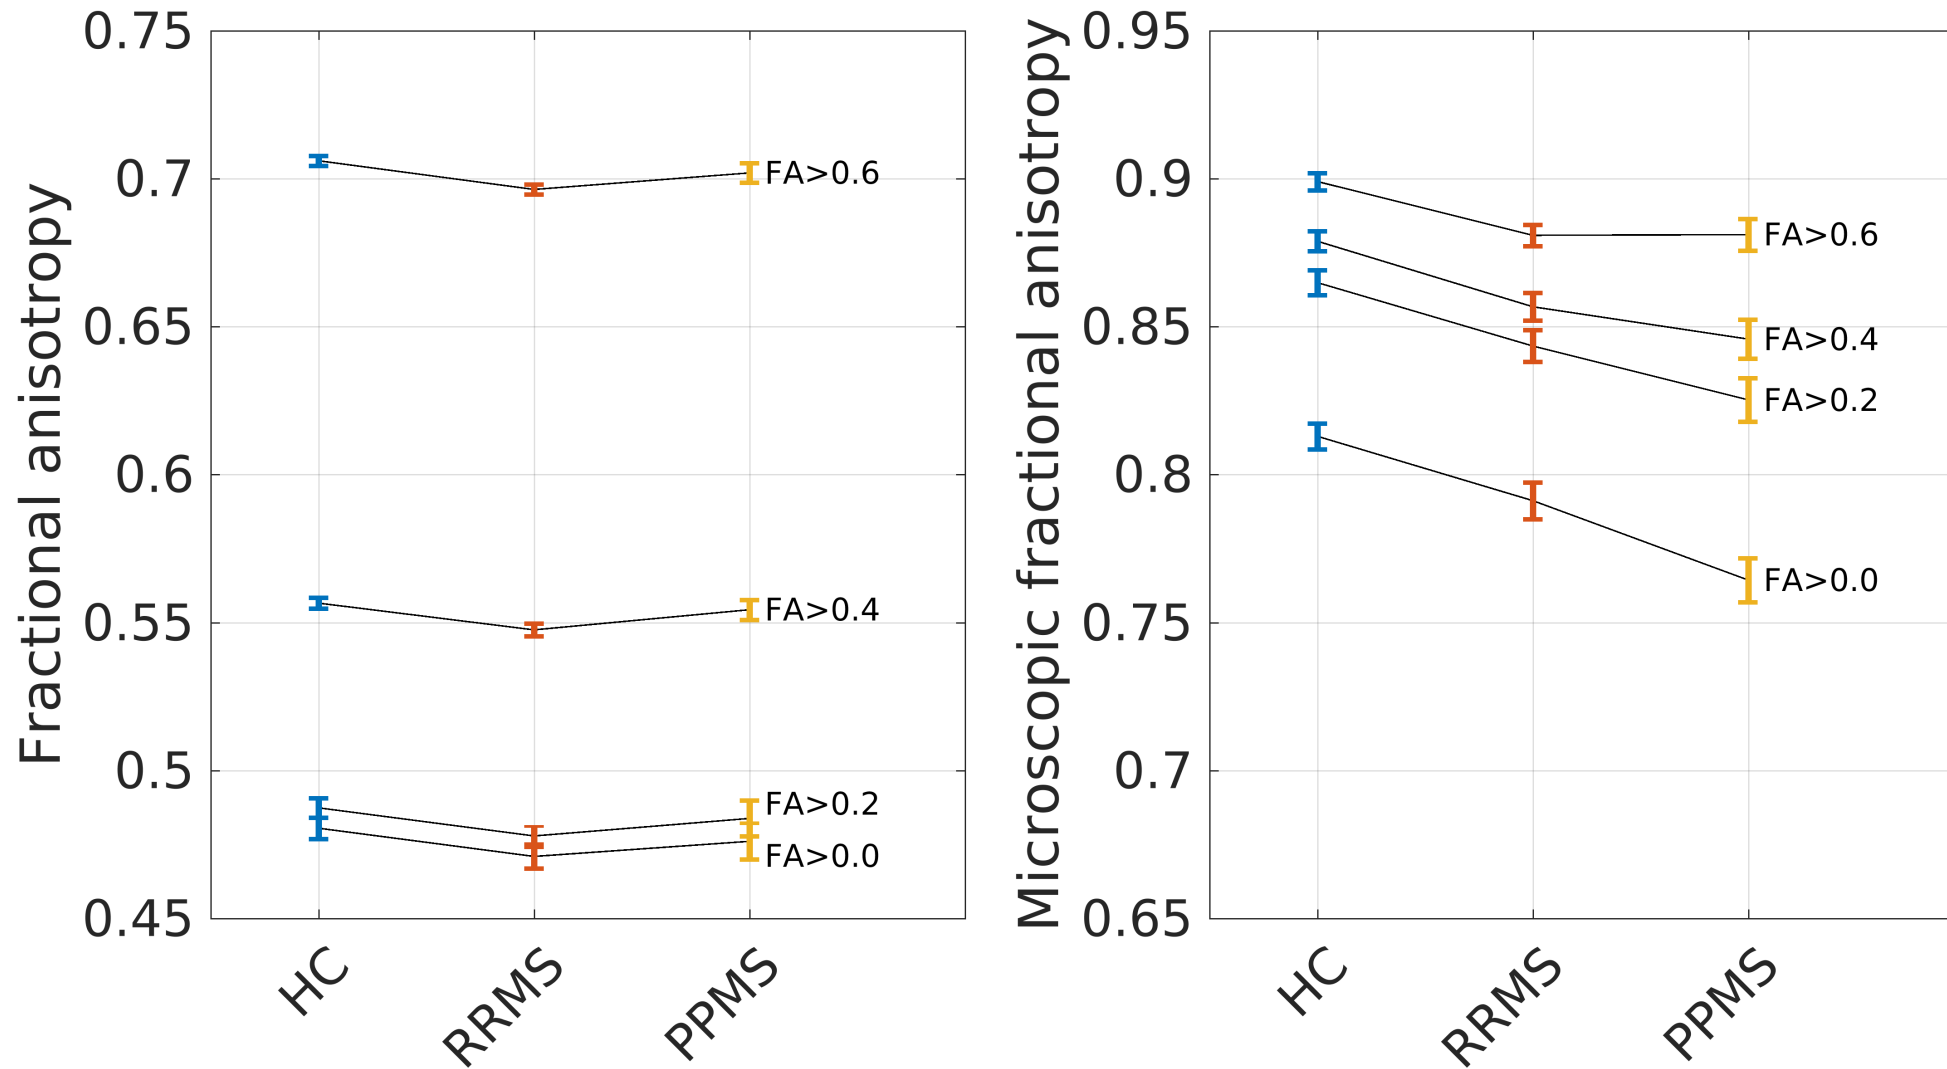

**Supplementary Figure 2 |** Group means (bars reflects standard error of the mean) when removing voxels with different fractional anisotropy (FA) thresholds. The thresholds used were 0.0 (i.e no threshold), 0.2, 0.4, 0.6. The relative group difference in FA remain constant for different FA thresholds. For microscopic fractional anisotropy ( $\mu$ FA), the relapsing-remitting multiple sclerosis and primary-progressive multiple sclerosis become more similar when discarding voxels with lower FA values from the analysis. HC = healthy controls, RRMS = relapsing-remitting multiple sclerosis, PPMS = primary progressive multiple sclerosis.

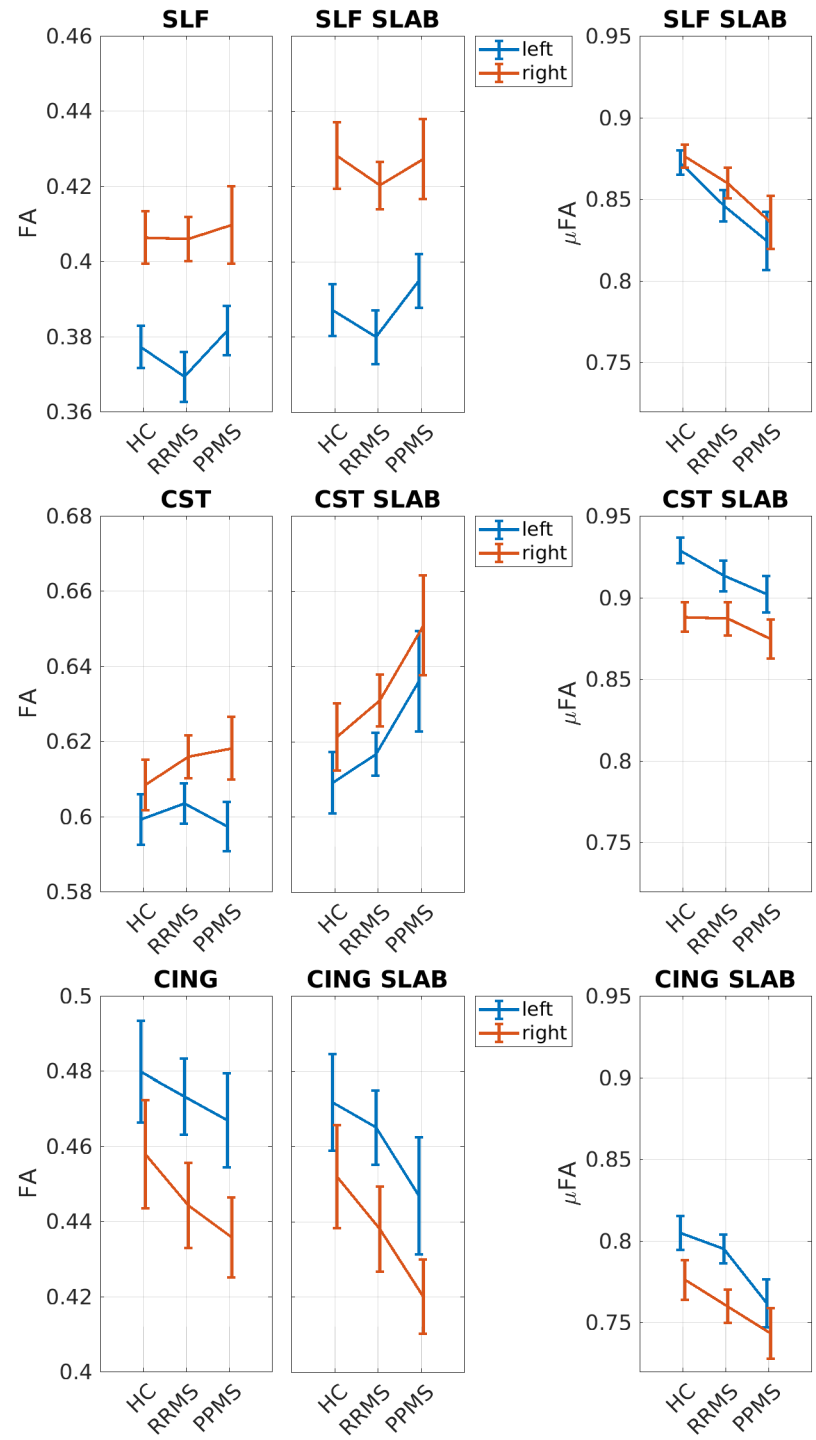

**Supplementary Figure 3 | Group differences for FA and  $\mu$ FA.** FA and  $\mu$ FA in superior longitudinal fasciculus (SLF) (first row), corticospinal tract (CST) (second row), cingulum (CING) (third row). HC = healthy controls, RRMS = relapsing-remitting multiple sclerosis, PPMS = primary progressive multiple sclerosis.

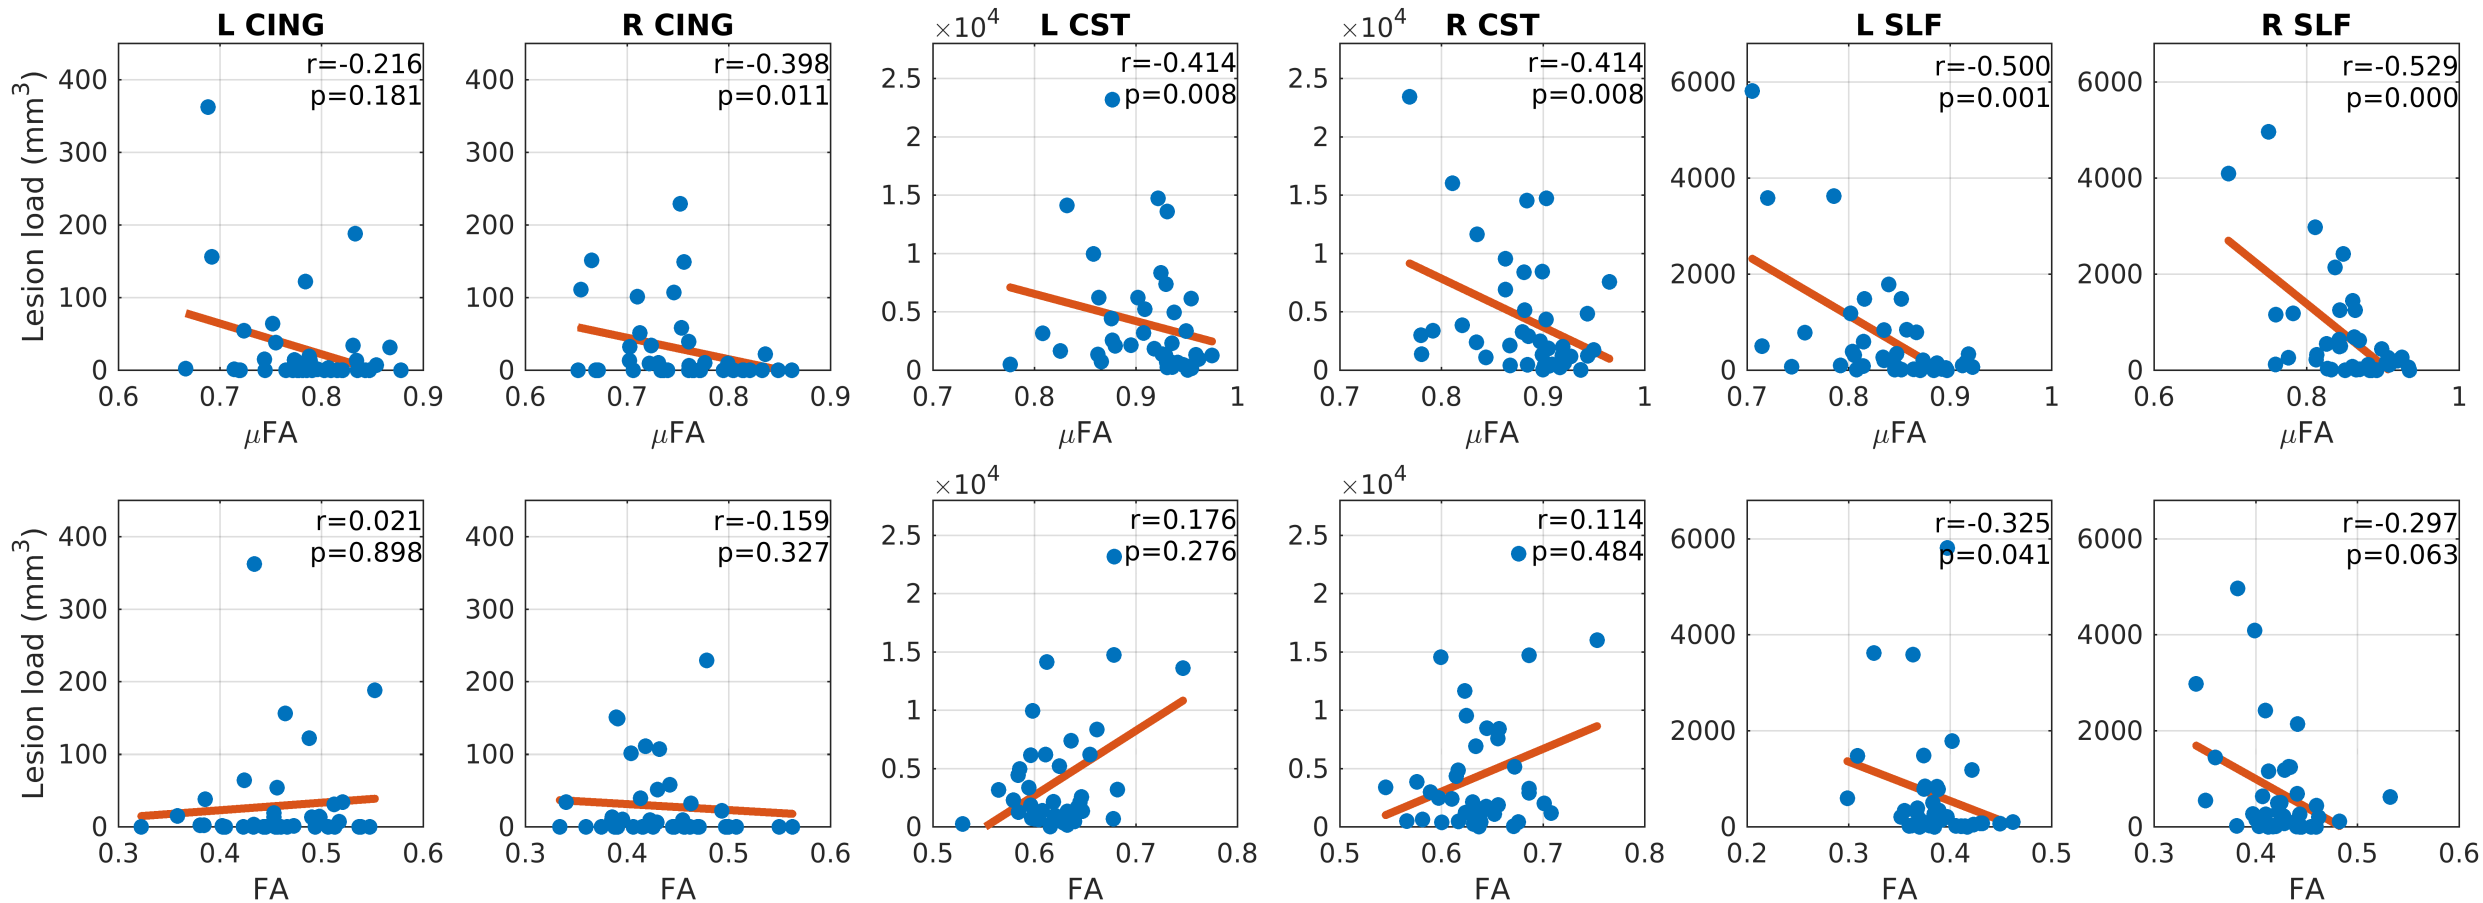

**Supplementary Figure 4** | correlations between lesion load and microscopic fractional anisotropy ( $\mu$ FA) (first row) and fractional anisotropy (FA) (second row) in individual ROIs. L = left, R = right, CING = cingulum, CST = corticospinal tract, SLF = superior longitudinal fasciculus.

|      |          |            |   | Healthy controls |              |              |              | Multiple sclerosis |              |              |              |               |              |
|------|----------|------------|---|------------------|--------------|--------------|--------------|--------------------|--------------|--------------|--------------|---------------|--------------|
|      |          |            |   | Age              |              | SDMT         |              | Age                |              | SDMT         |              | EDSS          |              |
|      |          |            |   | <i>r</i>         | <i>p</i>     | <i>r</i>     | <i>p</i>     | <i>r</i>           | <i>p</i>     | <i>r</i>     | <i>p</i>     | <i>r</i>      | <i>p</i>     |
| NAWM | FA       | Everything | L | <b>-0.588</b>    | <b>0.001</b> | 0.320        | 0.111        | 0.001              | 0.995        | -0.010       | 0.953        | -0.080        | 0.624        |
|      |          |            | R | <b>-0.422</b>    | <b>0.028</b> | 0.176        | 0.391        | -0.080             | 0.624        | 0.127        | 0.436        | -0.155        | 0.339        |
|      | FA       | Slab       | L | <b>-0.549</b>    | <b>0.003</b> | 0.311        | 0.121        | -0.088             | 0.591        | 0.068        | 0.676        | -0.157        | 0.333        |
|      |          |            | R | <b>-0.410</b>    | <b>0.034</b> | 0.221        | 0.278        | -0.119             | 0.465        | 0.163        | 0.314        | -0.220        | 0.173        |
|      | $\mu$ FA | Slab       | L | <b>-0.411</b>    | <b>0.033</b> | <i>0.369</i> | <i>0.064</i> | <b>-0.352</b>      | <b>0.026</b> | <b>0.517</b> | <b>0.001</b> | <b>-0.315</b> | <b>0.048</b> |
|      |          |            | R | <b>-0.579</b>    | <b>0.002</b> | <b>0.470</b> | <b>0.015</b> | <b>-0.503</b>      | <b>0.001</b> | <b>0.602</b> | <b>0.000</b> | <b>-0.434</b> | <b>0.005</b> |
| CING | FA       | Everything | L | <b>-0.393</b>    | <b>0.043</b> | <b>0.469</b> | <b>0.016</b> | <b>-0.326</b>      | <b>0.040</b> | <b>0.360</b> | <b>0.022</b> | -0.263        | 0.100        |
|      |          |            | R | -0.303           | 0.125        | 0.193        | 0.345        | <b>-0.313</b>      | <b>0.049</b> | 0.255        | 0.113        | -0.175        | 0.279        |
|      | FA       | Slab       | L | <b>-0.442</b>    | <b>0.021</b> | <b>0.482</b> | <b>0.013</b> | -0.203             | 0.210        | <i>0.274</i> | <i>0.087</i> | -0.161        | 0.321        |
|      |          |            | R | <i>-0.348</i>    | <i>0.076</i> | 0.206        | 0.314        | -0.217             | 0.179        | 0.201        | 0.214        | -0.123        | 0.449        |
|      | $\mu$ FA | Slab       | L | <b>-0.441</b>    | <b>0.021</b> | 0.320        | 0.111        | <b>-0.378</b>      | <b>0.016</b> | <b>0.549</b> | <b>0.000</b> | <b>-0.330</b> | <b>0.038</b> |
|      |          |            | R | -0.238           | 0.233        | <b>0.432</b> | <b>0.027</b> | <i>-0.290</i>      | <i>0.069</i> | <b>0.344</b> | <b>0.030</b> | -0.131        | 0.421        |
| CST  | FA       | Everything | L | <b>-0.482</b>    | <b>0.011</b> | 0.214        | 0.294        | 0.134              | 0.410        | -0.225       | 0.163        | <i>0.306</i>  | <i>0.055</i> |
|      |          |            | R | <b>-0.496</b>    | <b>0.008</b> | 0.161        | 0.433        | 0.146              | 0.368        | -0.160       | 0.323        | 0.201         | 0.213        |
|      | FA       | Slab       | L | -0.339           | <i>0.084</i> | 0.147        | 0.473        | -0.147             | 0.364        | 0.045        | 0.782        | 0.064         | 0.694        |
|      |          |            | R | <b>-0.394</b>    | <b>0.042</b> | 0.270        | 0.182        | 0.047              | 0.774        | 0.099        | 0.543        | 0.063         | 0.698        |
|      | $\mu$ FA | Slab       | L | -0.050           | 0.804        | -0.206       | 0.314        | -0.171             | 0.292        | 0.223        | 0.167        | <i>-0.294</i> | <i>0.065</i> |
|      |          |            | R | -0.032           | 0.876        | -0.031       | 0.880        | -0.062             | 0.702        | <i>0.299</i> | <i>0.061</i> | -0.202        | 0.211        |
| SLF  | FA       | Everything | L | <b>-0.398</b>    | <b>0.040</b> | -0.108       | 0.600        | 0.110              | 0.501        | -0.182       | 0.262        | <b>0.364</b>  | <b>0.021</b> |
|      |          |            | R | <i>-0.339</i>    | <i>0.083</i> | -0.188       | 0.358        | -0.067             | 0.683        | -0.148       | 0.363        | 0.156         | 0.337        |
|      | FA       | Slab       | L | <i>-0.376</i>    | <i>0.053</i> | -0.003       | 0.989        | 0.012              | 0.940        | -0.043       | 0.792        | 0.216         | 0.181        |
|      |          |            | R | -0.288           | 0.145        | -0.100       | 0.625        | -0.054             | 0.741        | -0.114       | 0.486        | 0.054         | 0.739        |
|      | $\mu$ FA | Slab       | L | -0.240           | 0.229        | 0.275        | 0.173        | <b>-0.360</b>      | <b>0.022</b> | <b>0.527</b> | <b>0.000</b> | -0.233        | 0.148        |
|      |          |            | R | -0.235           | 0.238        | <b>0.492</b> | <b>0.011</b> | <b>-0.383</b>      | <b>0.015</b> | <b>0.478</b> | <b>0.002</b> | <i>-0.285</i> | <i>0.074</i> |

**Supplementary Table 1.** This table shows correlations between age and SDMT within healthy controls and between age, EDSS, and SDMT in multiple sclerosis. FA = Fractional anisotropy;  $\mu$ FA = microscopic fractional anisotropy; EDSS = expanded disability status scale; SDMT = symbol digit modality test; L = left; R = right; CING = cingulum; CST = corticospinal tract; SLF = superior longitudinal fasciculus.

|      | $\mu$ FA         |                  |                    | FA                |                   |                    |
|------|------------------|------------------|--------------------|-------------------|-------------------|--------------------|
|      | Group            | Hemisphere       | Group x hemisphere | Group             | Hemisphere        | Group x hemisphere |
| CING | F=1.07<br>p=0.35 | F=2.03<br>p=0.16 | F=0.19<br>p=0.83   | F=0.87<br>p=0.43  | F=1.16<br>p=0.29  | F=0.16<br>p=0.85   |
| CST  | F=0.75<br>p=0.48 | F=3.60<br>p=0.06 | F=0.89<br>p=0.41   | F=5.34<br>p=0.007 | F=1.07<br>p=0.31  | F=0.08<br>p=0.92   |
| SLF  | F=2.57<br>p=0.09 | F=0.27<br>p=0.61 | F=1.21<br>p=0.31   | F=2.40<br>p=0.099 | F=8.71<br>p=0.004 | F=0.09<br>p=0.91   |

**Supplementary Table 2 | ANOVA results within each of the tracts for FA and  $\mu$ FA.**

CING = cingulum; CST = corticospinal tract; SLF = superior longitudinal fasciculus,  $\mu$ FA = microscopic fractional anisotropy, FA = fractional anisotropy.
